# Supplementary material for: Preparation of a silver ferrite-assisted tungsten oxide nanocomposite for efficient sonocatalytic degradation of organic pollutants activated by PMS followed by toxicity evaluation
Source: Royal Society of Chemistry journal article supplement (doi:10.1039/d4nj00390j), 2024-01-01
Supplement: d4nj00390j1.pdf [file d4nj00390j1.pdf]

## **Supplementary information**

**Preparation of silver ferrite assisted tungsten oxide nanocomposite for proficient sonocatalytic degradation of organic pollutant activated by PMS followed by toxicity evaluation**

Romiyo Justinabraham<sup>1</sup>, Arulappan Durairaj<sup>2</sup>, Samuel Vasanthkumar<sup>1,3\*</sup>

<sup>1</sup> Department of Applied Chemistry, Karunya Institute of Technology and Sciences, Coimbatore -641114, India.

<sup>2</sup> Department of Chemistry, Bar-Ilan Institute for Nanotechnology and Advanced Materials, Bar-Ilan University, Ramat-Gan 52900, Israel.

<sup>3</sup> Pelican Biotech & Chemical Labs Pvt Ltd, Cherthala, Kerala- 688533, India.

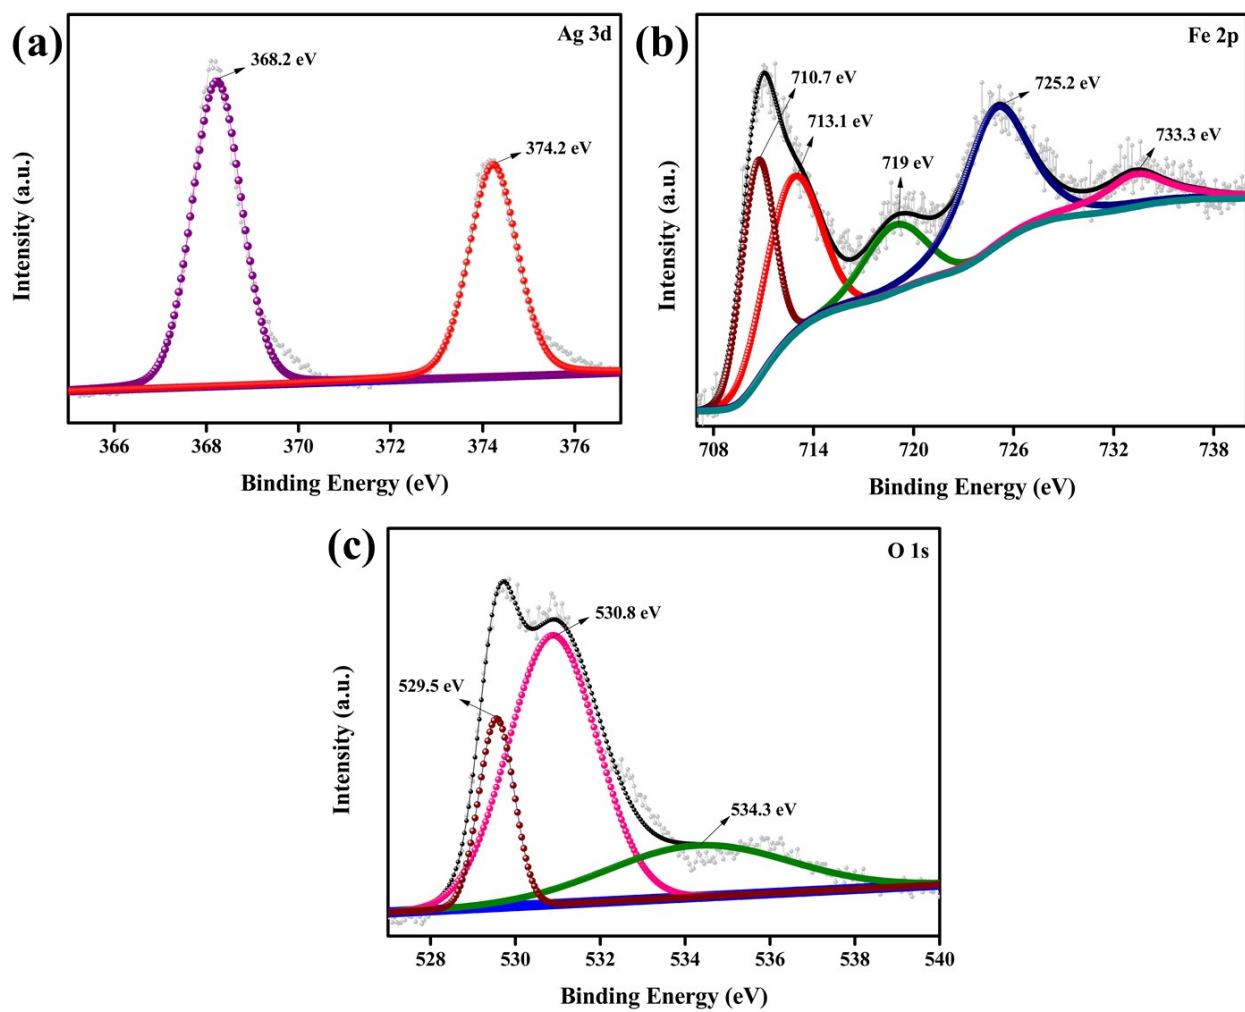

**Figure S1:** The high resolution XPS spectrum of (a) Ag 3d and (b) Fe 2p and (c) O 1s for AFO

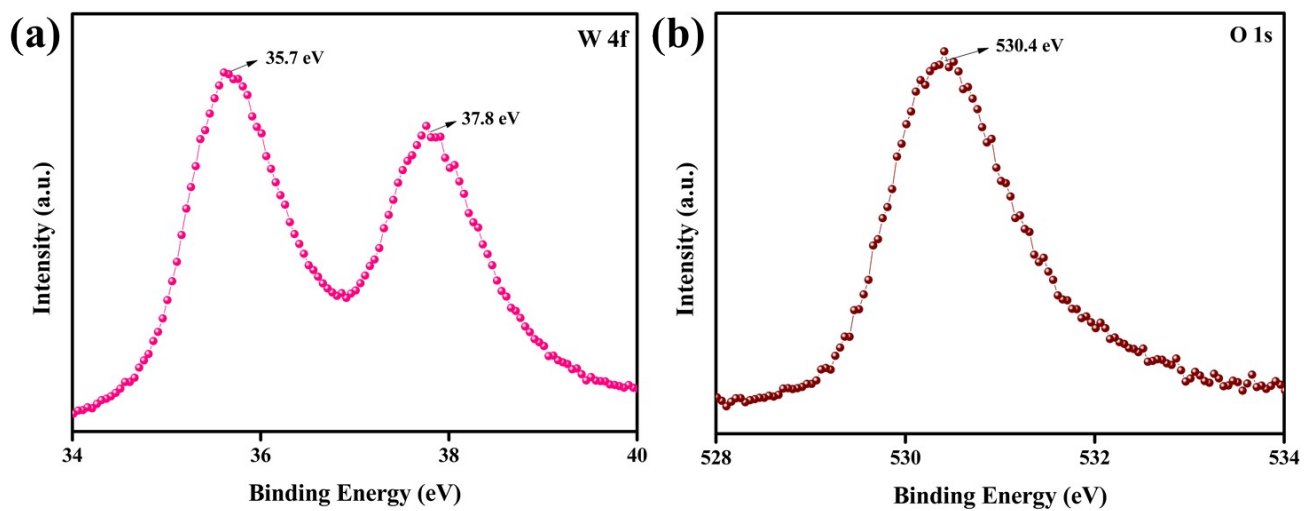

Figure S2: The high resolution XPS spectrum of (a) W 4f, (b) O 1s for  $\text{WO}_3$

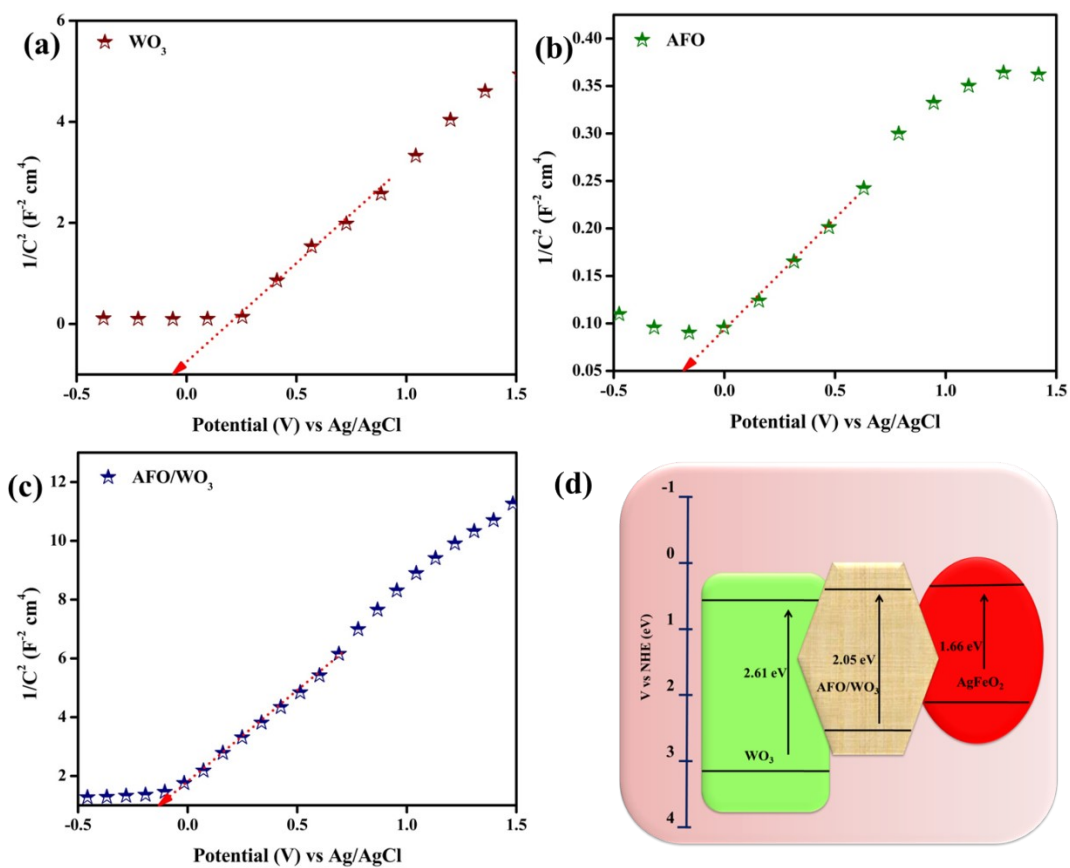

**Figure S3: Mott-Schottky plot of (a)  $WO_3$ , (b) AFO, (c) AFO/ $WO_3$  and (d) band potential of  $WO_3$ , AFO, AFO/ $WO_3$**

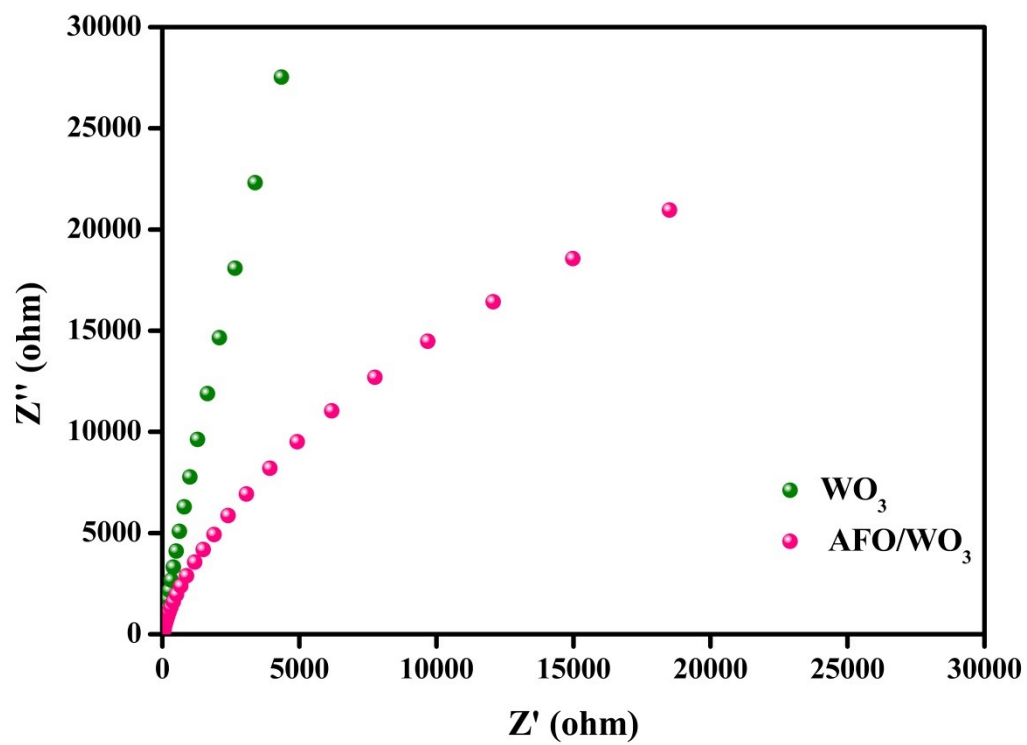

Figure S4: Electrochemical impedance spectroscopy analysis of  $\text{WO}_3$  and  $\text{AFO}/\text{WO}_3$  composite

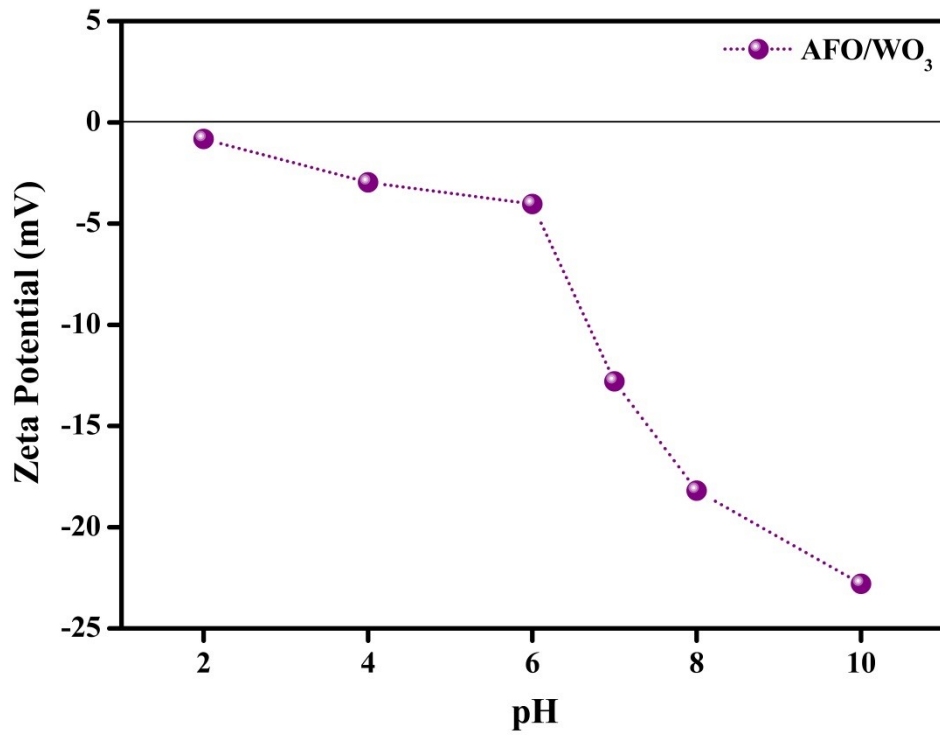

Figure S5: Zeta potential analysis of AFO/WO<sub>3</sub> composite at various pH conditions

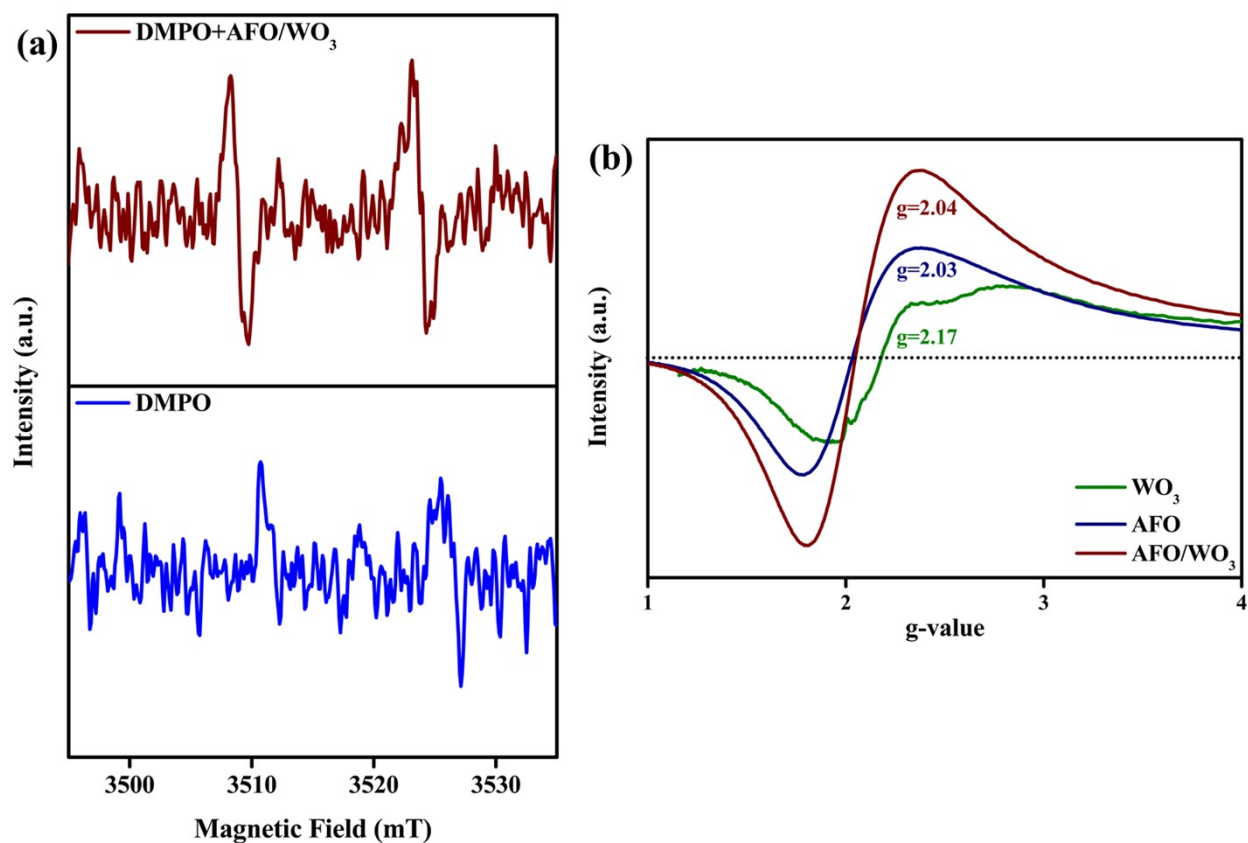

**Figure S6: (a) Electron spin resonance (ESR) spectra of AFO/WO<sub>3</sub> composite by using DMPO as trapping agent (b) The solid ESR signals of AFO, WO<sub>3</sub>, and AFO/WO<sub>3</sub> composite**



**Table S1:** The comparison table of previously reported sonocatalyst with AFO/WO<sub>3</sub> composite

| S. No | Sonocatalyst                                                             | Pollutant                   | Catalyst Dosage | Power/Oxidant                           | Duration | Degradation       | Ref  |
|-------|--------------------------------------------------------------------------|-----------------------------|-----------------|-----------------------------------------|----------|-------------------|------|
| 1.    | MIL-101(Cr)/CoFe <sub>2</sub> O <sub>4</sub>                             | RhB<br>(25 mg/L)<br>MO      | 0.5 g/L         | 37kHz/<br>H <sub>2</sub> O <sub>2</sub> | 140 min  | 96%<br><br>88%    | [23] |
| 2.    | MnFe <sub>2</sub> O <sub>4</sub> /MIL-101(Cr)                            | RhB<br>(25 mg/L)            | 0.5 g/L         | 37kHz/<br>H <sub>2</sub> O <sub>2</sub> | 180 min  | 96%               | [26] |
| 3.    | Ordered mesoporous C/TiO <sub>2</sub>                                    | RhB<br>(50 mg/L)            | 1g/L            | 300kHz                                  | 60 min   | 86%               | [41] |
| 4.    | ZnSe-graphene/TiO <sub>2</sub>                                           | RhB<br>(9.5mg/L)            | 2g/L            | 20kHz                                   | 150 min  | 82%               | [55] |
| 5.    | Fe <sub>3</sub> O <sub>4</sub> -graphene/ZnO@mesoporous-SiO <sub>2</sub> | MB<br>RhB<br>MO<br>(25mg/L) | 0.5g/L          | 20kHz                                   | 60 min   | 95%<br>84%<br>87% | [56] |
| 6.    | CdS NRs/NiFe <sub>2</sub> O <sub>4</sub> /NaX                            | RhB<br>(25mg/L)             | 1g/L            | 37kHz/<br>H <sub>2</sub> O <sub>2</sub> | 60 min   | 97.4%             | [57] |
| 7     | TiO <sub>2</sub> /AC                                                     | RhB<br>(200mg/L)            |                 | 30kHz                                   | 60 min   | 82.21%            | [58] |
| 8     | CdS                                                                      | RhB (5-20 mg/L)             | 0.1-0.15g       | 40kHz                                   | 240 min  | 70%               | [59] |
| 9.    | β-Bi <sub>2</sub> O <sub>3</sub>                                         | RhB<br>(5mg/L)              | 3g/L            | 60kHz                                   | 90 min   | 98.7%             | [60] |
| 10.   | TiO <sub>2</sub> Nanotubes                                               | RhB<br>(44.8mg/L)           | 2.14g/L         | 35kHz                                   | 180 min  | 94.6%             | [61] |
| 11.   | LuFeO <sub>3</sub>                                                       | RhB<br>(5mg/L)              | 4g/L            | 60kHz                                   | 90 min   | 90%               | [62] |
| 12.   | MIL101(Cr)/RGO/ZnFe <sub>2</sub> O <sub>4</sub>                          | RhB<br>(25mg/L)             | 0.5g/L          | 37kHz/<br>H <sub>2</sub> O <sub>2</sub> | 50 min   | 94%               | [63] |

|            |                                                  |                                                                  |                |                                         |               |                            |                      |
|------------|--------------------------------------------------|------------------------------------------------------------------|----------------|-----------------------------------------|---------------|----------------------------|----------------------|
| 13.        | Peat moss-derived biochar                        | RhB<br>(100mg/L)                                                 | 1g/L           | 40kHz                                   | 60 min        | 51.8%                      | [64]                 |
| 14.        | SiO <sub>2</sub> /Ag core/shell particles        | RhB<br>(10ppm)                                                   | 15mg/L         | 35kHz/<br>H <sub>2</sub> O <sub>2</sub> | 90 min        | 67%                        | [65]                 |
| 15.        | Ag <sub>2</sub> O/MgWO <sub>4</sub>              | RhB<br>(10mg/L)                                                  | 0.1g/L         | 40kHz                                   | 120 min       | 91.74%                     | [66]                 |
| 16         | Bi <sub>12</sub> O <sub>17</sub> Cl <sub>2</sub> | RhB<br>(8mg/L)                                                   | 2g/L           | 45kHz                                   | 30 min        | 90%                        | [67]                 |
| <b>17.</b> | <b>AgFeO<sub>2</sub>/WO<sub>3</sub></b>          | <b>RhB<br/>(470 mg/L)<br/>Mal G<br/>(360 mg/L)<br/>Mixed dye</b> | <b>0.1 g/L</b> | <b>PMS</b>                              | <b>35 Min</b> | <b>96%<br/>95%<br/>70%</b> | <b>This<br/>Work</b> |
